# Supplementary material for: Endometrial Factors Causing Subfertility in Cows
Source: Research Square preprint supplement (doi:10.21203/rs.3.rs-200187/v1), 2021-02-22
Supplement: Supplementary file 1 [file 46dc74d7d785c5ed67696604.xlsx]

## Sheet: Table3
Table3. Conception rate after ET in cows administered with resveratrol or vehicle
Treatment	Conception rate (Number of conception/ET recipient)
	Cows (unclassified for fertility)	Subfertile cows
Resveratrol	75.0%a (12/16)	40.0% (2/5)
Control	40.0%b (8/20)	0% (0/5)
Different letters in a same row indicate a significant (P < 0.05) difference between values.
